# Supplementary material for: Neurocan, an extracellular chondroitin sulfate proteoglycan, stimulates neuroblastoma cells to promote malignant phenotypes
Source: PubMed Central journal article supplement (PMC5739734; doi:10.18632/oncotarget.22435), 2017-11-15
Supplement: oncotarget-08-106296-s001.pdf [file oncotarget-08-106296-s001.pdf]

## Neurocan, an extracellular chondroitin sulfate proteoglycan, stimulates neuroblastoma cells to promote malignant phenotypes

### SUPPLEMENTARY MATERIALS

Supplementary Table 1: Patients' information

| Number | Sex <sup>1</sup> | Age <sup>2</sup> | Risk <sup>3</sup> | Stage <sup>4</sup> | MYCN <sup>5</sup> |
|--------|------------------|------------------|-------------------|--------------------|-------------------|
| #1     | F                | 9m               | low               | 1                  | NA                |
| #2     | M                | 0                | low               | 1                  | NA                |
| #3     | M                | 1m               | intermediate      | 4                  | NA                |
| #4     | F                | 1m               | intermediate      | 3                  | NA                |
| #5     | F                | 1y               | high              | 4                  | AMP               |
| #6     | F                | 1y               | high              | 4                  | AMP               |
| #7     | F                | 2y               | high              | 4                  | AMP               |

<sup>1</sup>sex: F, female; M, male

<sup>2</sup>age: y, year; m, month; 0, less than 1 month

<sup>3</sup>Risk: according to histological checking

<sup>4</sup>Stage: according to INSS stage system

<sup>5</sup>N-myc amplification status: NA, non-amplification; AMP, amplification

**Table 2: Primer information**

|                              | Forward primer sequence 5'-3'    | Reverse primer sequence 5'-3'      |
|------------------------------|----------------------------------|------------------------------------|
| RT-qPCR primers              |                                  |                                    |
| Mouse Gapdh                  | ggtggtgaagcaggcatctg             | ggaggccatgtagccatga                |
| Mouse TH                     | gcccagttctgcaggacat              | cacgaagtagacgggctggt               |
| Human MYCN                   | cgaccacaaggccctcagta             | cagccttgggtgtggaggag               |
| Mouse Ncan                   | ctggtggtccccatggatga             | ccatgcaggcaggggttgtt               |
| Mouse Vcan                   | ggctctggtgatgcgttct              | ccgggatcccagtggcaaaa               |
| Mouse Ptprz1                 | ccccagtggtggtgtgca               | ccctagccaccagcagagaa               |
| Mouse CD44                   | ccccggaccagtgtatgaca             | gcaaggccctaggaaggaa                |
| Mouse Cspg5                  | ggacctggcctcaggagaaa             | gccacgcacatcacctggaa               |
| Human CDK2                   | caagcctctgctgccaaa               | ggggactggggccaatcatt               |
| Human CDK4                   | gagcacagctgctgctggaa             | ggacctccatagcctcaga                |
| Human CDKN1B                 | ctgcgtagggcgctttgtt              | cgttctcaagtcccgggtt                |
| Human CDKN2C                 | ggtggtggagtctctggtga             | ggagccctcccacgtttat                |
| Human NSE                    | ccccaggtgcccagaactt              | cctgacgtcccatacagaa                |
| Human GAP43                  | gcctgatgaggcccggcaaa             | ctccttggtggggcatctt                |
| Human TrkA                   | ctgggggagctgagaaacct             | ggcacaccacagctggcatt               |
| Human MYC                    | gcccagtgaggatatctgga             | atcgcatgaaagctctggt                |
| Human OCT4                   | ggtgctgcccctctaggaa              | ctccccaccctttgtgtt                 |
| Human SOX2                   | cgaactggaggggggagaaa             | ccacctcccaggttttct                 |
| Human KLF4                   | ggaaggagcccagccagaaa             | cctccccaaactcacggatt               |
| Human NCAN                   | cagccaccccagacctgtt              | agggtggtctcccagttt                 |
| Mouse Myc                    | ctctgggtctccatgcat               | caggccaggtctctatcaa                |
| Mouse Oct4                   | ccgacgcttggcgggaaaaa             | cccgtgcaatgggcaagt                 |
| Mouse Klf4                   | ctggccatcgacactactt              | gtcctccggagtccgaagaa               |
| Human $\beta$ -ACTIN         | cctggcaccagcacaatgaa             | ctaatcatagtcgcctagaagca            |
| Human CD133                  | ggctgtgcccgaactccttt             | cagccccaggacacagcata               |
| Human CD114                  | gaggctcggaggtgtgca               | gcccagttaggctgcagtt                |
| Human ABCG2                  | gagggccaggagtcagtaa              | ccaggagtgtcagattcct                |
| Human Nestin                 | gcatgggggaggagtcgtt              | agctctgccacctggctact               |
| Human LGR5                   | ctgctgggtggcagcaagta             | gcaggaagtgggactaccac               |
| Mouse CD133                  | gcctctccctctggtgatt              | ggctgtcgcctatggccttaa              |
| Mouse CD114                  | ctgctgatggaccaaga                | cgggggatggagcagttgtt               |
| Mouse ABCG2                  | cctggtctctccctgcttt              | ggcctcagttagatgcagca               |
| Mouse nestin                 | gccgagcaggccactgaaaa             | ggcaagggggaagagaagga               |
| Mouse Lgr5                   | ccaggccgtctgtgatcagt             | caggaaggacgacaggaga                |
| <i>in situ</i> hybridization |                                  |                                    |
| probe1                       | ggaattcgctgggatcaggacacaca       | cgggatccgtagcagagcttaggcgaca       |
| probe2                       | ggaattcgctcagagagtaccagag        | cgggatccgtggtctgaaatggggttcc       |
| plasmid                      |                                  |                                    |
| Full length                  | agtctctgaggaacagggcacacaggatatac | agtctctagatcagcagaaattccctctgctctt |
| G1 domain                    | agtctctgaggaacagggcacacaggatatac | agtctctagatcagctgggtgatgagctcggaa  |
| CS domain                    | agtctctgagtcacaacatggagacctagag  | agtctctagatcatgagtcacctctccgcacc   |
| G3 domain                    | agtctctgaggatccctgtgagaacaacctt  | agtctctagatcagcagaaattccctctgctctt |
| G1CS domain                  | agtctctgaggaacagggcacacaggatatac | agtctctagatcatgagtcacctctccgcacc   |
| CSG3 domain                  | agtctctgagtcacaacatggagacctagag  | agtctctagatcagcagaaattccctctgctctt |
| signal peptide               | ctagctagcatgggggccccgttgtctg     | ccgctcagcccagcccaaaagagcagca       |

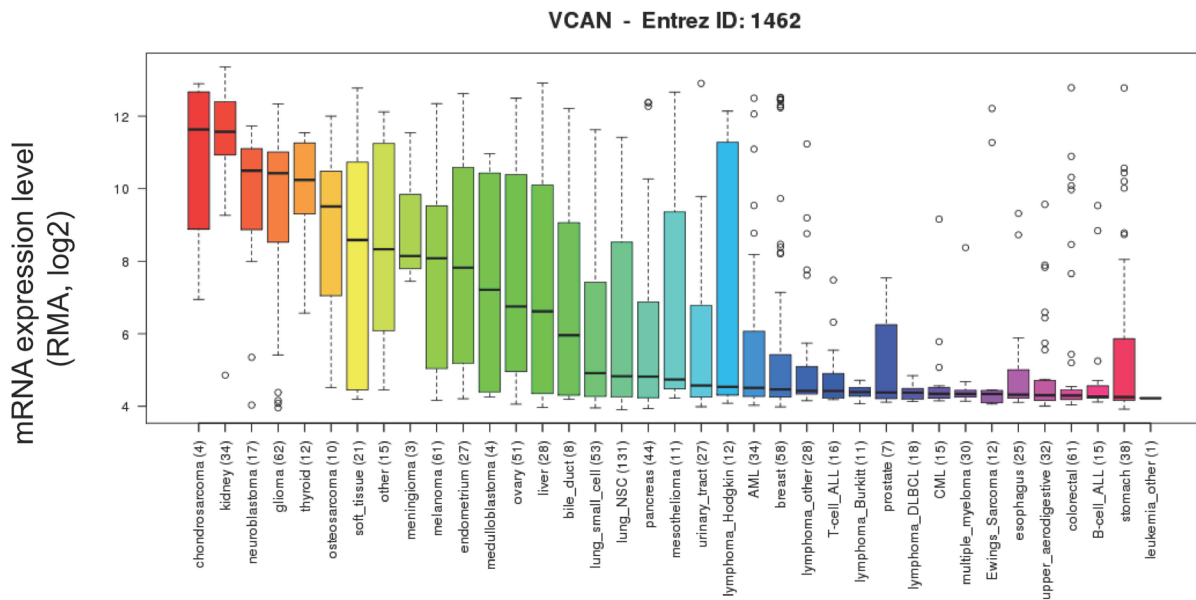

**Supplementary Figure 1: VCAN mRNA expression levels in various cancer cell lines.** Data was obtained from the cancer cell line encyclopedia (<http://portals.broadinstitute.org/ccle/home>).

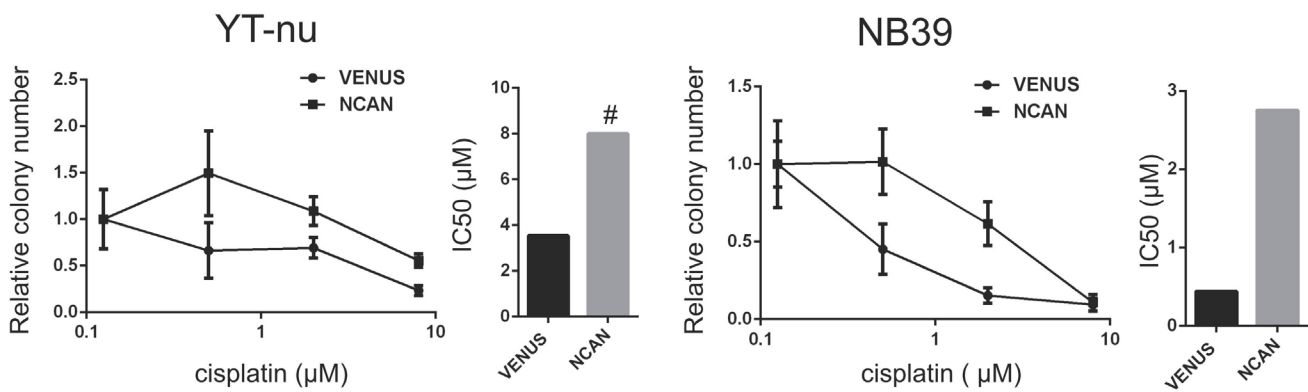

**Supplementary Figure 2: The anchorage-independent colony formation assay in the presence of cisplatin (0.125  $\mu\text{M}$ , 0.5  $\mu\text{M}$ , 2  $\mu\text{M}$ , 8  $\mu\text{M}$ ).** The colony numbers (diameter  $>250 \mu\text{m}$  for Yt-nu,  $>100 \mu\text{m}$  for NB39) in soft agar are shown ( $n = 3$ ). #, The IC<sub>50</sub> for NCAN was calculated tentatively as 8  $\mu\text{M}$ , because the viability of 8  $\mu\text{M}$  (highest concentration) was more than 50%.

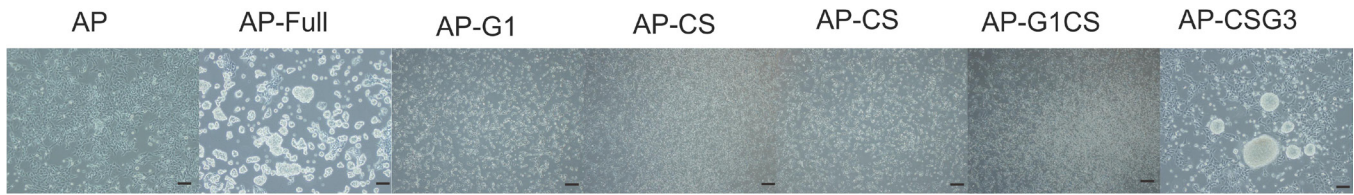

**Supplementary Figure 3: Representative images of TNB1 cells treated with conditioned media containing each version of AP-fused NCAN summarized in Figure 4E. Scale bars: 100  $\mu$ M.**

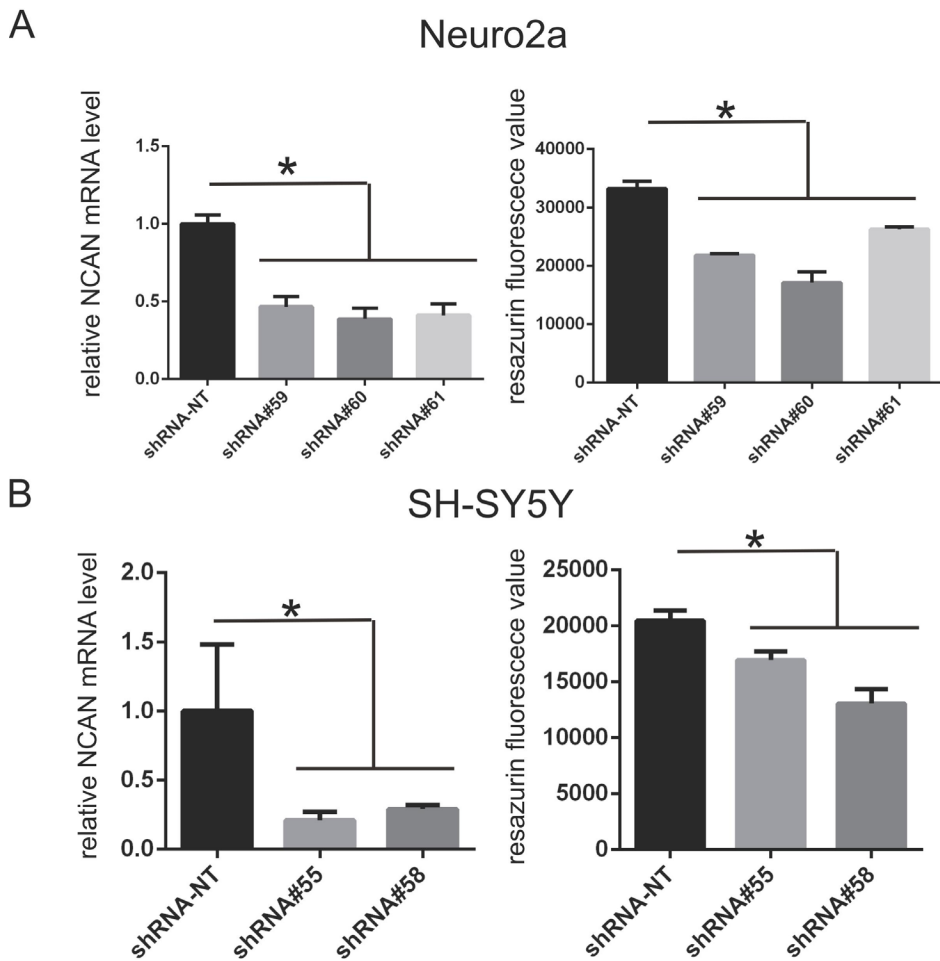

**Supplementary Figure 4: The knockdown of NCAN in adherent NB cell lines inhibit their proliferation. (A) The knockdown of NCAN in mouse Neuro2a cells. RT-qPCR for NCAN to make sure the knockdown results by three different shRNAs (left). The resazurin fluorescence values (right). (B) The same patterns of experiments as (A) using human SH-SY5Y cells. \* $p < 0.01$ .**

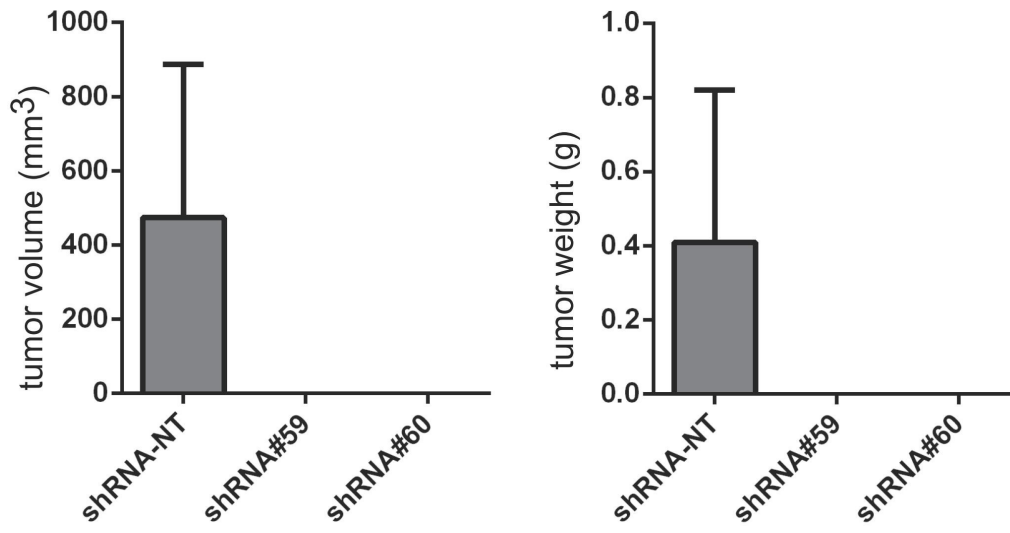

Supplementary Figure 5: Quantification of allograft tumor volumes (left) and weights (right) shown in Figure 6G.
